# Supplementary material
Source: Copernicus journal article supplement (doi:10.5194/essd-2026-29)
Supplement: Supplementary file 1 [file essd-2026-29-supplement.pdf]

## Supplemental Materials

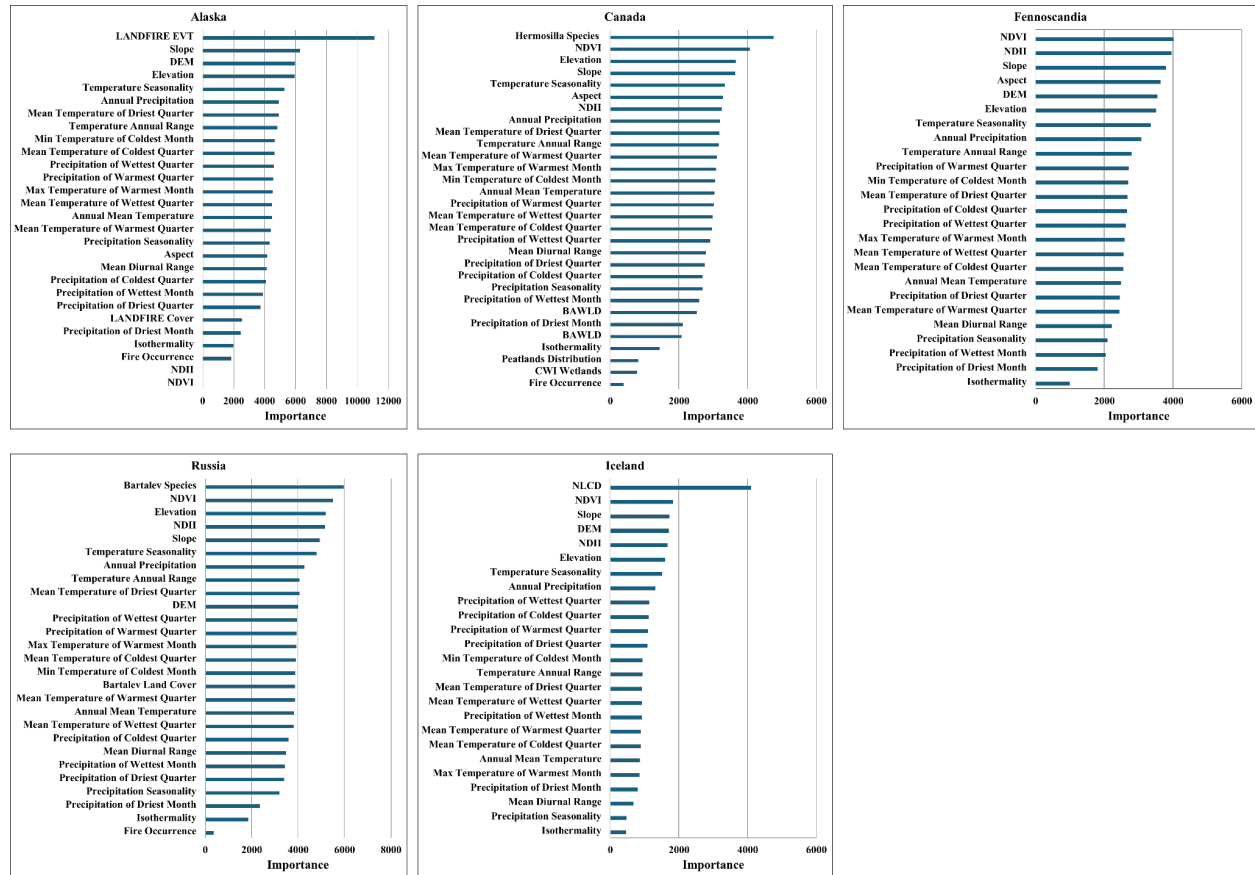

Supplemental Figure 1: Variable importance in the Random Forest model used to classify pixels within the hybrid land cover map.



| b)                  | Poplar Forest | Pine Forest | Fir Forest | Aspen Forest | Hemlock Forest | White Spruce Forest | Black Spruce Forest | Mixed Forest | Larch Forest | Birch Forest | Jack Pine Forest | Maple Forest | Alpine Shrubland | Riparian Shrubland | Other Shrubland | Herbaceous | Sparsely Vegetated | Bog | Fen | Marsh | Dwarf Shrub Tundra | Tall Shrub Tundra | Graminoid Tundra | Wet-sedge Tundra | Barren Tundra |   |
|---------------------|---------------|-------------|------------|--------------|----------------|---------------------|---------------------|--------------|--------------|--------------|------------------|--------------|------------------|--------------------|-----------------|------------|--------------------|-----|-----|-------|--------------------|-------------------|------------------|------------------|---------------|---|
| Poplar Forest       | 274           | 0           | 0          | 1            | 0              | 0                   | 0                   | 0            | 0            | 0            | 0                | 0            | 0                | 0                  | 0               | 0          | 0                  | 0   | 0   | 0     | 0                  | 0                 | 0                | 0                | 0             | 0 |
| Pine Forest         | 0             | 999         | 0          | 0            | 0              | 0                   | 0                   | 0            | 0            | 0            | 1                | 0            | 0                | 0                  | 0               | 0          | 0                  | 0   | 0   | 0     | 0                  | 0                 | 0                | 0                | 0             | 0 |
| Fir Forest          | 0             | 0           | 997        | 0            | 0              | 0                   | 0                   | 2            | 0            | 1            | 0                | 0            | 0                | 0                  | 0               | 0          | 0                  | 0   | 0   | 0     | 0                  | 0                 | 0                | 0                | 0             | 0 |
| Aspen Forest        | 1             | 0           | 0          | 955          | 0              | 0                   | 0                   | 41           | 0            | 0            | 2                | 0            | 0                | 0                  | 0               | 0          | 0                  | 0   | 1   | 0     | 0                  | 0                 | 0                | 0                | 0             | 0 |
| Hemlock Forest      | 0             | 0           | 0          | 0            | 1000           | 0                   | 0                   | 0            | 0            | 0            | 0                | 0            | 0                | 0                  | 0               | 0          | 0                  | 0   | 0   | 0     | 0                  | 0                 | 0                | 0                | 0             | 0 |
| White Spruce Forest | 0             | 4           | 1          | 1            | 0              | 981                 | 3                   | 0            | 0            | 0            | 0                | 0            | 1                | 5                  | 0               | 0          | 1                  | 0   | 0   | 0     | 2                  | 0                 | 1                | 0                | 0             | 0 |
| Black Spruce Forest | 0             | 0           | 0          | 0            | 0              | 14                  | 986                 | 0            | 0            | 0            | 0                | 0            | 0                | 0                  | 0               | 0          | 0                  | 0   | 0   | 0     | 0                  | 0                 | 0                | 0                | 0             | 0 |
| Mixed Forest        | 5             | 21          | 22         | 49           | 2              | 0                   | 0                   | 836          | 4            | 40           | 8                | 12           | 0                | 0                  | 0               | 0          | 0                  | 0   | 1   | 0     | 0                  | 0                 | 0                | 0                | 0             | 0 |
| Larch Forest        | 0             | 0           | 0          | 0            | 0              | 0                   | 0                   | 0            | 1000         | 0            | 0                | 0            | 0                | 0                  | 0               | 0          | 0                  | 0   | 0   | 0     | 0                  | 0                 | 0                | 0                | 0             | 0 |
| Birch Forest        | 0             | 0           | 1          | 0            | 0              | 1                   | 0                   | 2            | 2            | 849          | 0                | 0            | 0                | 0                  | 0               | 0          | 0                  | 0   | 0   | 0     | 0                  | 0                 | 0                | 0                | 0             | 0 |
| Jack Pine Forest    | 0             | 1           | 0          | 0            | 0              | 1                   | 1                   | 2            | 0            | 0            | 995              | 0            | 0                | 0                  | 0               | 0          | 0                  | 0   | 0   | 0     | 0                  | 0                 | 0                | 0                | 0             | 0 |
| Maple Forest        | 0             | 0           | 0          | 0            | 0              | 0                   | 0                   | 0            | 0            | 0            | 0                | 120          | 0                | 0                  | 0               | 0          | 0                  | 0   | 0   | 0     | 0                  | 0                 | 0                | 0                | 0             | 0 |
| Alpine Shrubland    | 0             | 1           | 1          | 0            | 0              | 0                   | 0                   | 0            | 0            | 0            | 0                | 0            | 982              | 10                 | 5               | 0          | 0                  | 0   | 0   | 0     | 0                  | 1                 | 0                | 0                | 0             | 0 |
| Riparian Shrubland  | 0             | 1           | 0          | 0            | 0              | 0                   | 0                   | 1            | 0            | 0            | 0                | 0            | 22               | 749                | 3               | 0          | 0                  | 0   | 0   | 0     | 10                 | 3                 | 1                | 0                | 0             | 0 |
| Other Shrubland     | 0             | 0           | 0          | 9            | 0              | 0                   | 0                   | 8            | 0            | 5            | 0                | 0            | 33               | 30                 | 878             | 0          | 0                  | 11  | 2   | 0     | 5                  | 4                 | 9                | 6                | 0             | 0 |
| Herbaceous          | 0             | 0           | 0          | 0            | 0              | 0                   | 0                   | 0            | 0            | 0            | 0                | 0            | 0                | 0                  | 0               | 1          | 0                  | 0   | 0   | 0     | 0                  | 0                 | 0                | 0                | 0             | 0 |
| Sparsely Vegetated  | 0             | 0           | 0          | 0            | 0              | 0                   | 0                   | 0            | 0            | 0            | 0                | 0            | 3                | 12                 | 0               | 0          | 104                | 0   | 0   | 0     | 0                  | 0                 | 4                | 2                | 0             | 0 |
| Bog                 | 0             | 0           | 0          | 1            | 0              | 0                   | 0                   | 0            | 0            | 0            | 0                | 0            | 0                | 0                  | 0               | 0          | 0                  | 999 | 0   | 0     | 0                  | 0                 | 0                | 0                | 0             | 0 |
| Fen                 | 0             | 0           | 0          | 1            | 0              | 0                   | 0                   | 0            | 1            | 0            | 0                | 0            | 0                | 0                  | 0               | 0          | 0                  | 0   | 998 | 0     | 0                  | 0                 | 0                | 0                | 0             | 0 |
| Marsh               | 0             | 0           | 0          | 3            | 0              | 0                   | 0                   | 1            | 0            | 0            | 0                | 0            | 1                | 2                  | 0               | 0          | 0                  | 0   | 0   | 794   | 1                  | 0                 | 5                | 1                | 0             | 0 |
| Dwarf Shrub Tundra  | 0             | 0           | 0          | 0            | 0              | 0                   | 0                   | 0            | 0            | 0            | 0                | 0            | 1                | 2                  | 2               | 0          | 0                  | 0   | 0   | 1     | 876                | 49                | 52               | 17               | 0             | 0 |
| Tall Shrub Tundra   | 0             | 0           | 0          | 0            | 0              | 0                   | 0                   | 0            | 0            | 0            | 0                | 0            | 0                | 10                 | 2               | 0          | 0                  | 0   | 0   | 0     | 34                 | 921               | 31               | 2                | 0             | 0 |
| Graminoid Tundra    | 0             | 0           | 0          | 0            | 0              | 0                   | 0                   | 0            | 0            | 0            | 0                | 0            | 0                | 0                  | 8               | 0          | 1                  | 0   | 0   | 0     | 29                 | 29                | 910              | 23               | 0             | 0 |
| Wet-sedge Tundra    | 0             | 0           | 0          | 0            | 0              | 0                   | 0                   | 0            | 0            | 0            | 0                | 0            | 1                | 1                  | 10              | 0          | 1                  | 0   | 0   | 1     | 9                  | 4                 | 18               | 952              | 3             | 0 |
| Barren Tundra       | 0             | 0           | 0          | 0            | 0              | 0                   | 0                   | 0            | 0            | 0            | 0                | 0            | 0                | 0                  | 0               | 0          | 0                  | 2   | 0   | 0     | 0                  | 0                 | 14               | 2                | 75            | 0 |



| d)                            | Ash Forest | Pine Forest | Mixed Forest | Birch Forest | Scots Pine Forest | Other Shrublands | Herbaceous | Sparse Vegetation | Bog | Fen | Marsh | Dwarf Shrub Tundra | Prostrate Shrub Tundra | Graminoid Tundra | Wet-sedge Tundra | Barren Tundra |
|-------------------------------|------------|-------------|--------------|--------------|-------------------|------------------|------------|-------------------|-----|-----|-------|--------------------|------------------------|------------------|------------------|---------------|
| <b>Ash Forest</b>             | 791        | 26          | 8            | 21           | 16                | 10               | 5          | 4                 | 4   | 0   | 0     | 1                  | 5                      | 7                | 2                | 0             |
| <b>Pine Forest</b>            | 14         | 841         | 9            | 1            | 13                | 1                | 10         | 0                 | 4   | 1   | 0     | 1                  | 0                      | 0                | 5                | 0             |
| <b>Mixed Forest</b>           | 17         | 9           | 807          | 10           | 18                | 2                | 33         | 0                 | 3   | 0   | 0     | 0                  | 0                      | 0                | 1                | 0             |
| <b>Birch Forest</b>           | 22         | 8           | 12           | 763          | 8                 | 27               | 13         | 10                | 15  | 0   | 0     | 7                  | 2                      | 3                | 10               | 0             |
| <b>Scots Pine Forest</b>      | 26         | 30          | 19           | 11           | 747               | 14               | 24         | 0                 | 18  | 0   | 0     | 0                  | 0                      | 6                | 5                | 0             |
| <b>Other Shrublands</b>       | 27         | 14          | 0            | 17           | 12                | 728              | 15         | 3                 | 28  | 0   | 0     | 19                 | 9                      | 15               | 13               | 0             |
| <b>Herbaceous</b>             | 3          | 8           | 30           | 1            | 7                 | 2                | 841        | 0                 | 0   | 0   | 0     | 0                  | 1                      | 0                | 7                | 0             |
| <b>Sparse Vegetation</b>      | 7          | 2           | 0            | 0            | 1                 | 0                | 2          | 843               | 4   | 0   | 0     | 4                  | 23                     | 12               | 2                | 0             |
| <b>Bog</b>                    | 15         | 8           | 2            | 30           | 8                 | 12               | 44         | 1                 | 745 | 0   | 0     | 11                 | 1                      | 10               | 13               | 0             |
| <b>Fen</b>                    | 0          | 0           | 0            | 0            | 0                 | 0                | 0          | 0                 | 0   | 41  | 0     | 4                  | 0                      | 2                | 0                | 0             |
| <b>Marsh</b>                  | 0          | 0           | 0            | 6            | 0                 | 0                | 6          | 0                 | 0   | 0   | 29    | 0                  | 0                      | 1                | 0                | 0             |
| <b>Dwarf Shrub Tundra</b>     | 18         | 2           | 1            | 13           | 2                 | 23               | 1          | 6                 | 25  | 0   | 0     | 762                | 31                     | 8                | 8                | 0             |
| <b>Prostrate Shrub Tundra</b> | 7          | 3           | 0            | 6            | 1                 | 13               | 3          | 54                | 9   | 0   | 0     | 36                 | 758                    | 6                | 4                | 0             |
| <b>Graminoid Tundra</b>       | 13         | 3           | 1            | 2            | 8                 | 9                | 11         | 24                | 19  | 0   | 0     | 10                 | 6                      | 777              | 17               | 0             |
| <b>Wet-sedge Tundra</b>       | 2          | 9           | 4            | 0            | 9                 | 6                | 13         | 0                 | 2   | 0   | 0     | 5                  | 2                      | 19               | 829              | 0             |
| <b>Barren Tundra</b>          | 1          | 1           | 0            | 1            | 0                 | 0                | 7          | 2                 | 0   | 0   | 0     | 2                  | 2                      | 6                | 0                | 43            |

| e)                     | Herbaceous | Bog | Fen | Marsh | Dwarf Shrub Tundra | Prostrate Shrub Tundra | Tall Shrub Tundra | Wet-sedge Tundra | Barren Tundra |
|------------------------|------------|-----|-----|-------|--------------------|------------------------|-------------------|------------------|---------------|
| Herbaceous             | 847        | 127 | 0   | 26    | 0                  | 0                      | 0                 | 0                | 0             |
| Bog                    | 29         | 859 | 2   | 72    | 38                 | 0                      | 0                 | 0                | 0             |
| Fen                    | 16         | 63  | 109 | 1     | 28                 | 0                      | 0                 | 0                | 0             |
| Marsh                  | 27         | 55  | 0   | 475   | 2                  | 0                      | 0                 | 0                | 0             |
| Dwarf Shrub Tundra     | 0          | 9   | 4   | 0     | 987                | 0                      | 0                 | 0                | 0             |
| Prostrate Shrub Tundra | 0          | 0   | 0   | 0     | 0                  | 1000                   | 0                 | 0                | 0             |
| Tall Shrub Tundra      | 0          | 0   | 0   | 0     | 0                  | 0                      | 1000              | 0                | 0             |
| Wet-sedge Tundra       | 0          | 0   | 0   | 0     | 0                  | 0                      | 0                 | 1000             | 0             |
| Barren Tundra          | 0          | 0   | 0   | 0     | 0                  | 0                      | 0                 | 0                | 1000          |

**Figure S2:** Confusion matrix for the Random Forest classifier used within Google Earth Engine for each major region Alaska (a), Canada(b), Russia (c), Fennoscandia (d), Iceland (e).

**Table S1:** Characteristics of the ancillary products used in the study.

| <b>Variable</b>          | <b>Dataset</b>                           | <b>Spatial Resolution</b> | <b>Extent</b> | <b>Reference</b>                |
|--------------------------|------------------------------------------|---------------------------|---------------|---------------------------------|
| Slope, Aspect, Elevation | Arctic DEM                               | 1 km                      | Circumpolar   | (Porter et al., 2022)           |
|                          | EarthEnv                                 | 1km                       | Global        | (Amatulli et al., 2018)         |
| Historical Fire          | Canadian National Fire Database (CNFDB)  | -                         | Canada        | Natural Resources Canada, 2017. |
|                          | MODIS Fire Burned Area                   | 250m                      | Global        | (Giglio et al., 2021)           |
|                          | Alaska Fire History Map                  | -                         | Alaska        | Alaskan LFDB                    |
| Vegetation Cover         | LANDFIRE Existing Vegetation Cover (EVC) | 30 m                      | Alaska        | LANDFIRE, 2020                  |
|                          | Vegetation Zone                          | -                         | Canada        | (Baldwin, 2020)                 |
| NDVI<br>NDII             | MODIS MOD13Q1                            | 500m                      | Global        | (Didan, 2021)                   |

A.

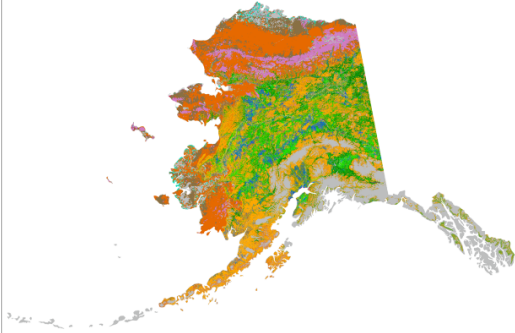

- Class**
- Herbaceous
  - Sparsely Vegetated
  - Poplar forest
  - Bog
  - Aspen Forest
  - Fen
  - Hemlock forest
  - Erect-shrub tundra
  - White Spruce forest
  - Prostrate-shrub tundra
  - Black Spruce forest
  - Shrub tundra
  - Mixed forest
  - Graminoid tundra
  - Birch forest
  - Wet-sedge tundra
  - Cedar forest
  - Barren tundra
  - Alpine shrubland
  - Developed
  - Riparian shrubland
  - Fir forest
  - Other shrublands
  -

B.

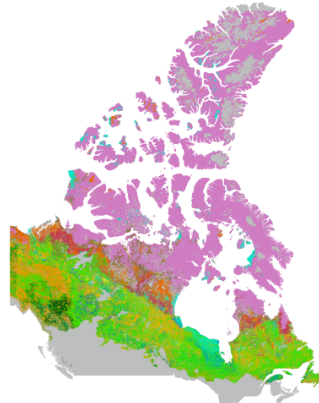

- Class**
- Other shrublands
  - Herbaceous
  - Sparsely Vegetated
  - Poplar forest
  - Bog
  - Pine Forest
  - Fen
  - Aspen Forest
  - Marsh
  - Hemlock forest
  - Erect-shrub tundra
  - White Spruce forest
  - Prostrate-shrub tundra
  - Black Spruce forest
  - Shrub tundra
  - Mixed forest
  - Graminoid tundra
  - Larch forest
  - Wet-sedge tundra
  - Birch forest
  - Barren tundra
  - Jack Pine forest
  - Developed
  - Maple
  - Fir forest
  - Alpine shrubland
  - 
  - Riparian shrubland

C.

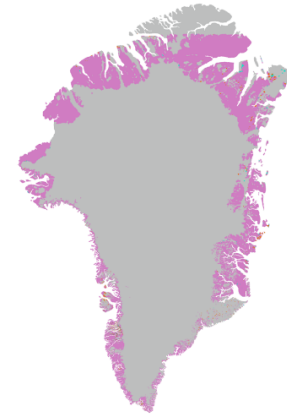

- Class**
- Erect-shrub tundra
  - Prostrate-shrub tundra
  - Shrub tundra
  - Graminoid tundra
  - Wet-sedge tundra
  - Barren tundra

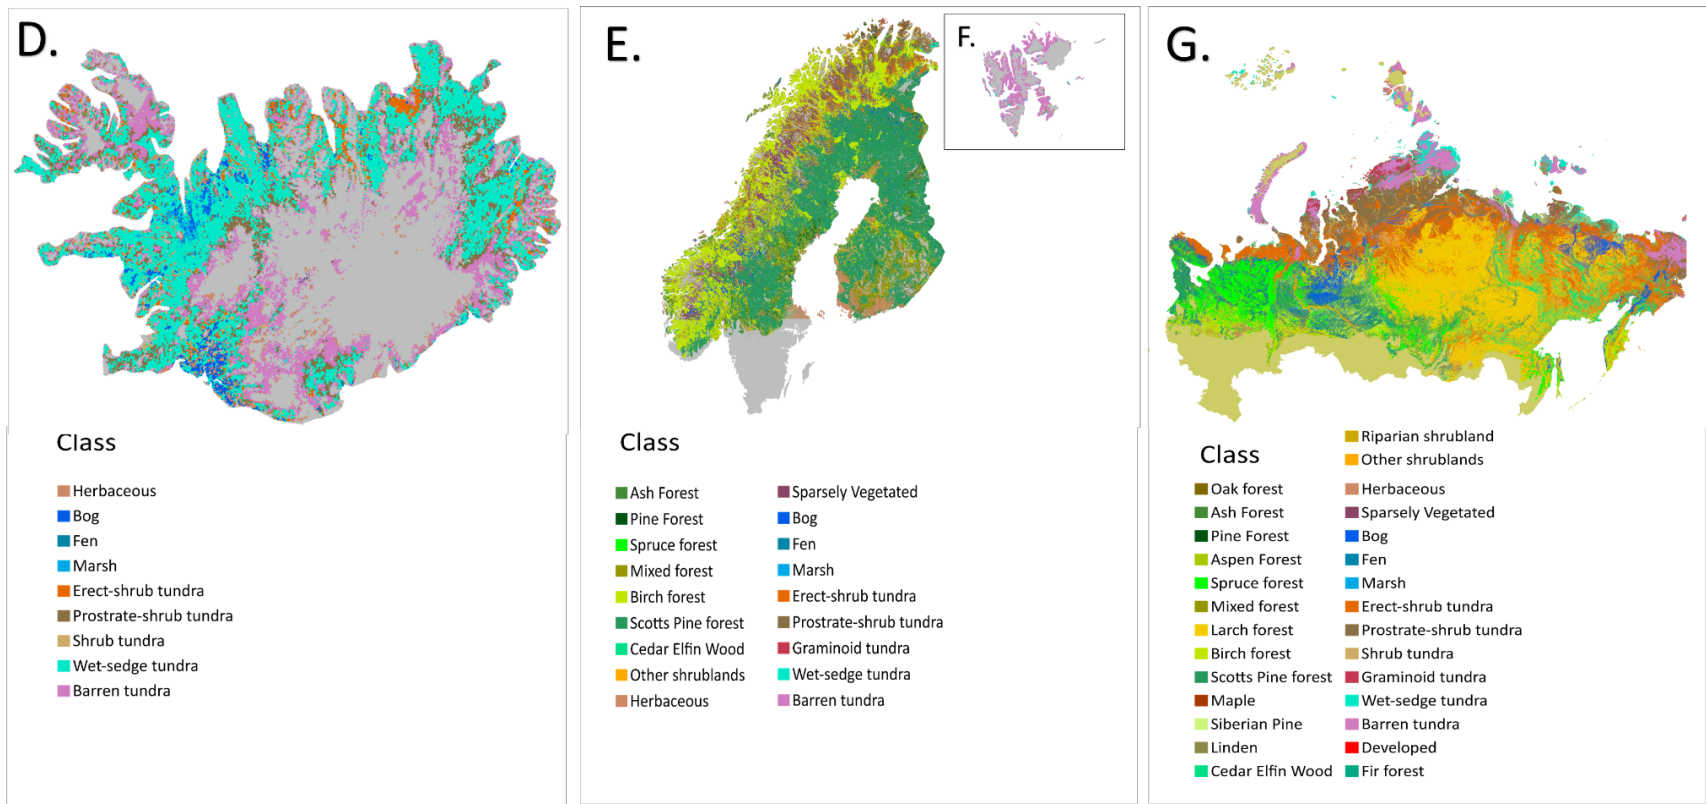

**Figure S3:** Final Hybrid map at 1 km resolution for each major region included within the study (A) Alaska, (B) Canada, (C) Greenland, (D) Iceland, (E) Fennoscandia including (F) Svalbard, (G) Russia, with the land cover classes present within each region.

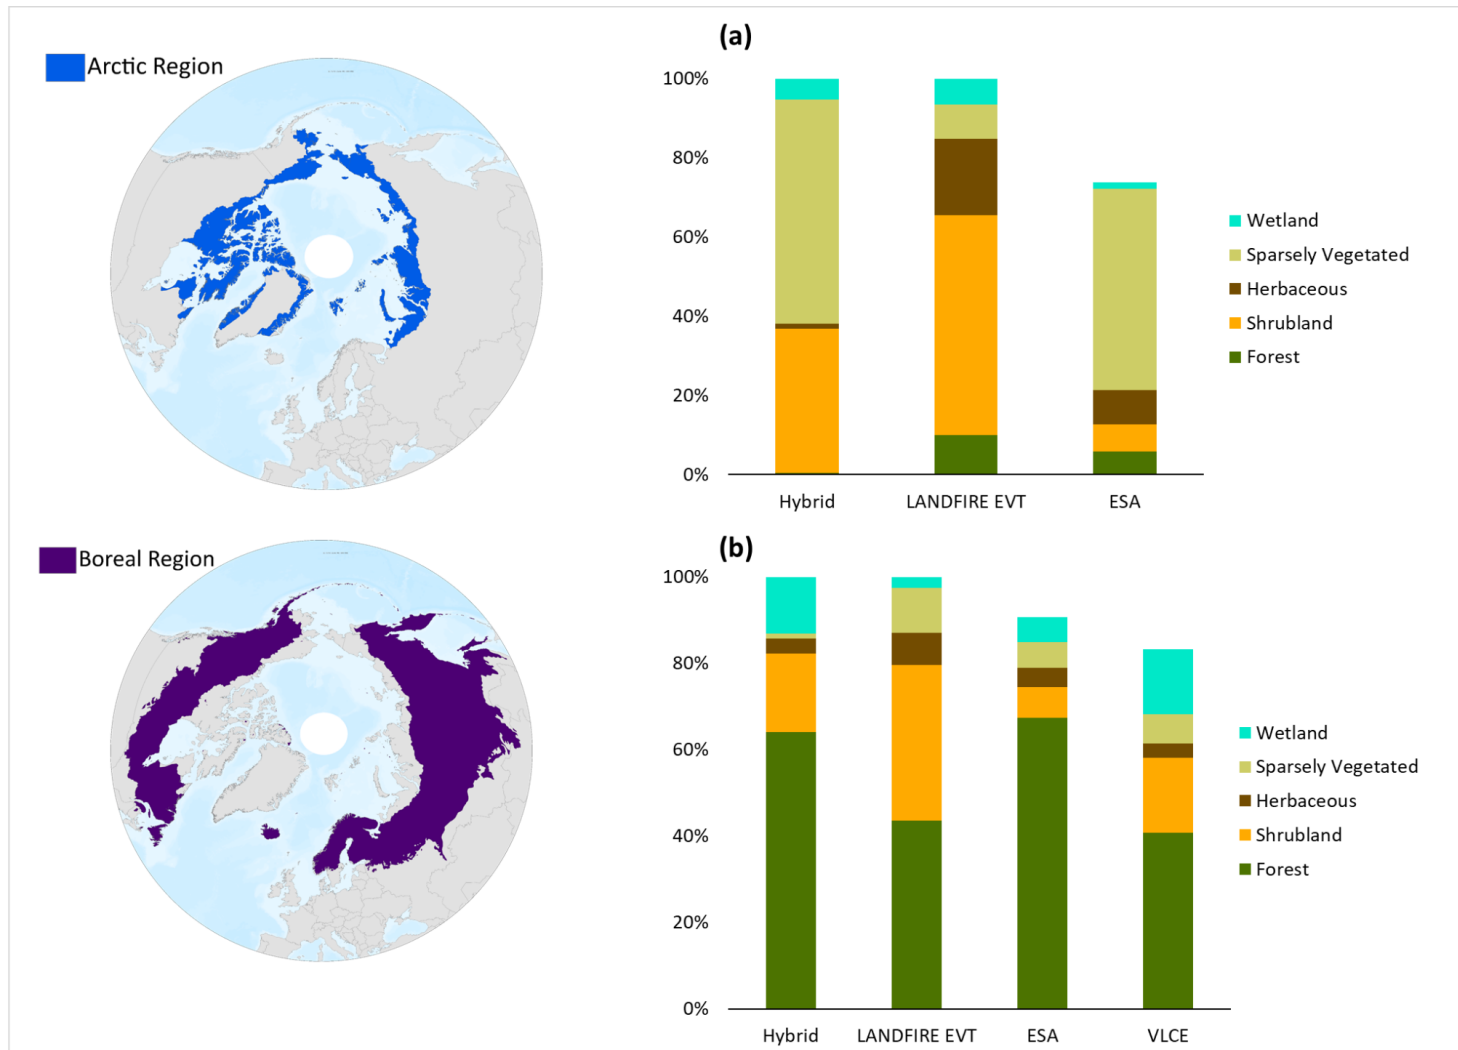

**Figure S4:** Assessment of major land cover class types for the regional and global land cover product grouped by biome, Arctic (a) and Boreal (b) . Panels show the total proportion of each class over the entire extent for major land cover classes.

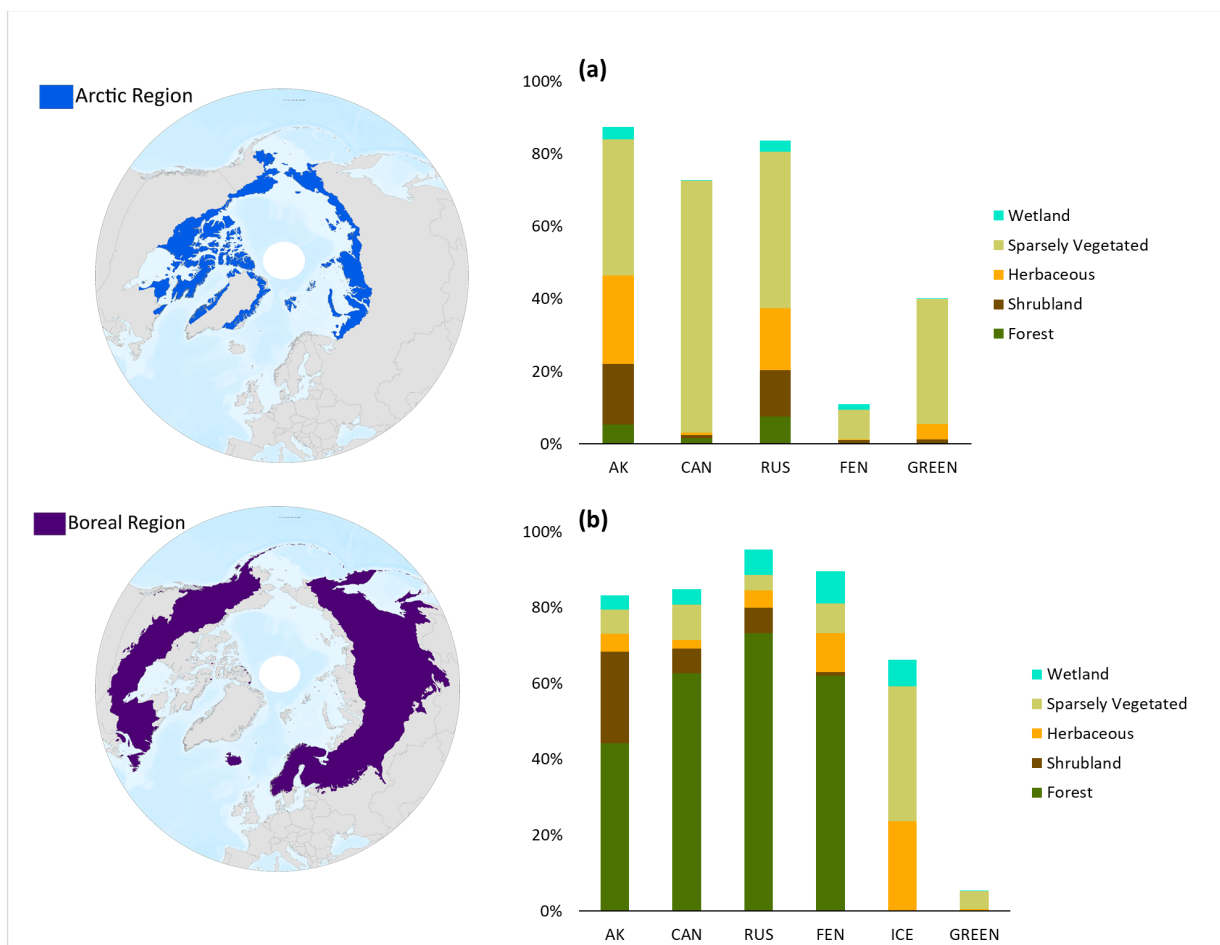

**Figure S5:** Assessment of major land cover class types for the ESA-CCI land cover product grouped by biome, Arctic (a,b) and Boreal (c,d). Panels show the total proportion of each class over the entire extent (a,c), and further subdivided by major region (b,d), including Alaska (AK), Canada (CAN), Iceland (ICE), Greenland (GRE), Fennoscandia (FEN), and Russia (RUS).

**Table S2:** Full list of the European Space Agency Climate Change Initiative Land Cover Product (ESA-CCI-LC) classes.

| VALUE | LABEL                                                                             |
|-------|-----------------------------------------------------------------------------------|
| 0     | No Data                                                                           |
| 10    | Cropland, rainfed                                                                 |
| 20    | Cropland, irrigated or post-flooding                                              |
| 30    | Mosaic cropland (>50%)/ natural vegetation (tree, shrub, herbaceous cover) (<50%) |
| 40    | Mosaic natural vegetation (tree, shrub, herbaceous cover) (>50%)/ cropland (<50%) |
| 50    | Tree cover, broadleaved, evergreen, closed to open (>15%)                         |
| 60    | Tree cover, broadleaved, deciduous, closed to open (>15%)                         |
| 70    | Tree cover, needleleaved, evergreen, closed to open (>15%)                        |
| 80    | Tree cover, needleleaved, deciduous, closed to open (>15%)                        |
| 90    | Tree cover, mixed leaf type (broadleaved and needleleaved)                        |
| 100   | Mosaic tree and shrub (>50%) / herbaceous cover (<50%)                            |
| 110   | Mosaic herbaceous cover (>50%) / tree and shrub (<50%)                            |
| 120   | Shrubland                                                                         |
| 130   | Grassland                                                                         |
| 140   | Lichens and mosses                                                                |
| 150   | Sparse vegetation (tree, shrub, herbaceous cover) (<15%)                          |
| 160   | Tree cover, flooded, fresh or brackish water                                      |
| 170   | Tree cover, flooded, saline water                                                 |
| 180   | Shrub or herbaceous cover, flooded, fresh/saline/brackish water                   |
| 190   | Urban areas                                                                       |
| 200   | Bare areas                                                                        |
| 210   | Water bodies                                                                      |
| 220   | Permanent snow and ice                                                            |

**Table S3:** Complete list of land cover classes for the Circum Arctic Land Cover Units (CALU) Product.

| CALU |                                                                                                                                                                          |
|------|--------------------------------------------------------------------------------------------------------------------------------------------------------------------------|
| 1    | Open water                                                                                                                                                               |
| 2    | Shallow water                                                                                                                                                            |
| 3    | Permanent wetland, aquatic, low to medium organic layer thickness, medium mineral volumetric content.                                                                    |
| 4    | Wet to aquatic (seasonal wetland), abundant moss, low to medium organic layer thickness, low mineral volumetric content.                                                 |
| 5    | Moist to wet tundra, abundant moss, prostrate shrubs, low to medium organic layer thickness, medium mineral volumetric content.                                          |
| 6    | Dry to moist tundra, partially barren, prostrate shrubs, medium organic layer thickness, high mineral volumetric content                                                 |
| 7    | Dry tundra, abundant lichen, prostrate shrubs, low to medium organic layer thickness, high mineral volumetric content.                                                   |
| 8    | Dry to aquatic tundra, dwarf shrubs (sparse tree cover along treeline, woodlands and open stands), medium organic layer thickness, medium mineral volumetric content.    |
| 9    | Dry to moist tundra, prostrate to low shrubs, tussocks, low to medium organic layer thickness, medium mineral volumetric content.                                        |
| 10   | Moist tundra, abundant moss, prostrate to low shrubs, tussocks, low organic layer thickness, medium mineral volumetric content.                                          |
| 11   | Moist tundra, abundant moss, dwarf and low shrubs, tussocks, low organic layer thickness, medium mineral volumetric content.                                             |
| 12   | Moist tundra, dense dwarf and low shrubs (sparse tree cover along treeline, woodlands with open stands), medium organic layer thickness, low mineral volumetric content. |
| 13   | Moist to wet tundra, dense dwarf and low shrubs (sparse tree cover along treeline, woodlands with open stands).                                                          |
| 14   | Moist tundra, low shrubs, medium organic layer thickness, medium mineral volumetric content.                                                                             |
| 15   | Moist to wet tundra, abundant lichen, in some cases partially barren (disturbed).                                                                                        |
| 16   | Moist tundra, abundant forbs, dwarf to tall shrubs, medium organic layer thickness.                                                                                      |
| 17   | Recently burned or flooded, partially barren.                                                                                                                            |
| 18   | Forest (deciduous) with dwarf to tall shrubs.                                                                                                                            |
| 19   | Forest (mixed) with dwarf to tall shrubs.                                                                                                                                |
| 20   | Forest (needle leaf) with dwarf and low shrubs.                                                                                                                          |
| 21   | Partially barren, dry.                                                                                                                                                   |
| 22   | Snow/Ice                                                                                                                                                                 |
| 23   | Other                                                                                                                                                                    |

| CLASS           | LANDFIRE EVT_NAME                                                                                                                                                                                                                                                                                                                                                                                                                                                                                                                                                                                                                                                                                                                                                                                                                                                                                                                                                                                                                                                                                                                                                                                                                                               |
|-----------------|-----------------------------------------------------------------------------------------------------------------------------------------------------------------------------------------------------------------------------------------------------------------------------------------------------------------------------------------------------------------------------------------------------------------------------------------------------------------------------------------------------------------------------------------------------------------------------------------------------------------------------------------------------------------------------------------------------------------------------------------------------------------------------------------------------------------------------------------------------------------------------------------------------------------------------------------------------------------------------------------------------------------------------------------------------------------------------------------------------------------------------------------------------------------------------------------------------------------------------------------------------------------|
| Dwarf Shrubland | <p style="text-align: center;">           Alaska Arctic Coastal Sedge-Dwarf-Shrubland<br/>           North American Arctic Dwarf-Shrub Lichen Tundra<br/>           North American Arctic Sparse Tundra<br/>           Western North American Boreal Alpine Dwarf-shrubland         </p>                                                                                                                                                                                                                                                                                                                                                                                                                                                                                                                                                                                                                                                                                                                                                                                                                                                                                                                                                                        |
| Herbaceous      | <p style="text-align: center;">           Alaska Sub-boreal and Maritime Alpine Mesic Herbaceous Meadow<br/>           Alaskan Pacific Maritime Mesic Herbaceous Meadow<br/>           Aleutian Mesic Herbaceous Meadow<br/>           North American Arctic Mesic Herbaceous Meadow<br/>           Western North American Boreal Alpine Mesic Herbaceous Meadow<br/>           Agriculture-Cultivated Crops and Irrigated Agriculture<br/>           Alaskan Pacific Maritime Coastal Meadow and Slough-Levee<br/>           Alaskan Pacific-Aleutian Coastal Dune Beach and Beach Meadow<br/>           Alaskan Pacific-Aleutian Fen and Wet Meadow<br/>           North American Arctic Dwarf-shrub-Sphagnum Peatland<br/>           North American Arctic-Subarctic Coastal Dune &amp; Beach Meadow<br/>           North American Arctic-Subarctic Tussock Tundra<br/>           Western North American Boreal Dry Grassland<br/>           Western North American Boreal Mesic Bluejoint-Forb Meadow<br/>           Western North American Boreal Wet Meadow<br/>           North American Arctic Wet Sedge-Sphagnum Peatland<br/>           North American Arctic Polygonal Ground Tussock Tundra<br/>           Agriculture-Pasture and Hay         </p> |

|                             |                                                                                                                                                                                                                                                                                                                                                                                                                                                                                                |
|-----------------------------|------------------------------------------------------------------------------------------------------------------------------------------------------------------------------------------------------------------------------------------------------------------------------------------------------------------------------------------------------------------------------------------------------------------------------------------------------------------------------------------------|
|                             |                                                                                                                                                                                                                                                                                                                                                                                                                                                                                                |
| <p>No Dominant Lifeform</p> | <p>Developed-Low Intensity<br/>         Developed-Medium Intensity<br/>         Developed-High Intensity<br/>         Developed-Roads<br/>         Developed-Open Space</p>                                                                                                                                                                                                                                                                                                                    |
| <p>Non-vegetated</p>        | <p>Developed-Open Space<br/>         Open Water<br/>         North American Glacier and Ice Field<br/>         Alaskan Pacific-Aleutian Rocky Coastline and Sea Cliff<br/>         Aleutian Volcanic Rock and Talus<br/>         North American Arctic Bedrock and Talus<br/>         Western North American Boreal Montane-Alpine Talus and Bedrock<br/>         Western North American Boreal Cliff Scree and Rock<br/>         North American Arctic-Subarctic Coastal Dune &amp; Beach</p> |

|                              |                                                                                                                                                                                                                                                                                                                                                                                                                                                                                                                                                                                                                                                                                                                                                                                                                                                                                                                                                                                                                                                                                                                                                                                                                                                                                             |
|------------------------------|---------------------------------------------------------------------------------------------------------------------------------------------------------------------------------------------------------------------------------------------------------------------------------------------------------------------------------------------------------------------------------------------------------------------------------------------------------------------------------------------------------------------------------------------------------------------------------------------------------------------------------------------------------------------------------------------------------------------------------------------------------------------------------------------------------------------------------------------------------------------------------------------------------------------------------------------------------------------------------------------------------------------------------------------------------------------------------------------------------------------------------------------------------------------------------------------------------------------------------------------------------------------------------------------|
|                              | <p>North Pacific Montane Massive Bedrock-Cliff and Talus<br/> North Pacific Alpine and Subalpine Bedrock and Scree<br/> North American Glacial Outwash</p>                                                                                                                                                                                                                                                                                                                                                                                                                                                                                                                                                                                                                                                                                                                                                                                                                                                                                                                                                                                                                                                                                                                                  |
| <p>Deciduous Tree Canopy</p> | <p>Western North American Boreal Treeline Hardwood-White Spruce Woodland<br/> Alaskan Pacific Floodplain Deciduous Forest<br/> Western North American Boreal Lowland Large River Floodplain Deciduous Forest<br/> Western North American Boreal Montane Floodplain Deciduous Forest<br/> Western North American Boreal Riparian Stringer Deciduous Forest<br/> Western North American Boreal Mesic Birch-Aspen Forest<br/> Alaskan Pacific Floodplain Shrubland (Deciduous Forest)<br/> Western North American Boreal Lowland Large River Floodplain Shrubland (Deciduous Forest)<br/> Western North American Boreal Montane Floodplain Shrubland (Deciduous Forest)<br/> Western North American Boreal Riparian Stringer Shrubland (Deciduous Forest)</p>                                                                                                                                                                                                                                                                                                                                                                                                                                                                                                                                  |
| <p>Evergreen Tree Canopy</p> | <p>Alaskan Pacific Maritime Mountain Hemlock-Shore Pine Peatland<br/> Alaskan Pacific Poorly Drained Conifer Woodland<br/> Western North American Boreal Black Spruce Bog and Dwarf-Tree Peatland<br/> Western North American Boreal Wet Black Spruce-Tussock Woodland<br/> Alaskan Pacific Floodplain Conifer Forest<br/> Western North American Boreal Lowland Large River Floodplain Conifer Forest<br/> Western North American Boreal Montane Floodplain Conifer Forest<br/> Western North American Boreal Spruce-Lichen Woodland<br/> Western North American Boreal Treeline White Spruce Woodland<br/> Alaskan Pacific Floodplain Shrubland (Conifer Forest)<br/> Western North American Boreal Lowland Large River Floodplain Shrubland (Conifer Forest)<br/> Western North American Boreal Montane Floodplain Shrubland (Conifer Forest)<br/> Alaska Sub-boreal Mountain Hemlock-White Spruce Forest<br/> Alaska Sub-boreal White-Lutz Spruce Forest and Woodland<br/> Alaskan Pacific Maritime Western Hemlock Forest<br/> Alaskan Pacific Mesic Western Hemlock-Yellow-cedar Forest<br/> Alaskan Pacific Mountain Hemlock Forest and Subalpine Woodland<br/> Alaskan Pacific Sitka Spruce Forest and Beach Ridge<br/> Western North American Boreal Mesic White Spruce Forest</p> |

|                          |                                                                                                                                                                                                                                                                                                                                                                                                                                                                                                                                                                                                                                                                                                                                                                                                                                                                                                                                                                                                                                                                                                                                                                                                                                                   |
|--------------------------|---------------------------------------------------------------------------------------------------------------------------------------------------------------------------------------------------------------------------------------------------------------------------------------------------------------------------------------------------------------------------------------------------------------------------------------------------------------------------------------------------------------------------------------------------------------------------------------------------------------------------------------------------------------------------------------------------------------------------------------------------------------------------------------------------------------------------------------------------------------------------------------------------------------------------------------------------------------------------------------------------------------------------------------------------------------------------------------------------------------------------------------------------------------------------------------------------------------------------------------------------|
|                          | <p>Western North American Boreal Mesic-Wet Black Spruce Forest and Woodland<br/> Western North American Boreal Mesic-Wet Black Spruce-Hardwood Forest and Woodland</p>                                                                                                                                                                                                                                                                                                                                                                                                                                                                                                                                                                                                                                                                                                                                                                                                                                                                                                                                                                                                                                                                            |
| <p>Mixed Tree Canopy</p> | <p>Western North American Boreal Black Spruce-Tamarack Fen<br/> Western North American Boreal Riparian Stringer Conifer Forest<br/> Alaskan Pacific Floodplain Mixed Forest<br/> Western North American Boreal Lowland Large River Floodplain Mixed Forest<br/> Western North American Boreal Montane Floodplain Mixed Forest<br/> Western North American Boreal Riparian Stringer Mixed Forest<br/> Western North American Boreal Riparian Stringer Shrubland (Conifer Forest)<br/> Alaskan Pacific Floodplain Shrubland (Mixed Forest)<br/> Western North American Boreal Lowland Large River Floodplain Shrubland (Mixed Forest)<br/> Western North American Boreal Montane Floodplain Shrubland (Mixed Forest)<br/> Western North American Boreal Riparian Stringer Shrubland (Mixed Forest)<br/> North Pacific Hypermaritime Western Red-cedar-Western Hemlock Forest<br/> Western North American Boreal Treeline White Spruce-Hardwood Woodland<br/> Western North American Boreal Mesic Hardwood-White Spruce Forest<br/> Western North American Boreal Mesic White Spruce-Hardwood Forest<br/> Alaska Sub-boreal Hardwood-White-Lutz Spruce Forest and Woodland<br/> Alaska Sub-boreal White-Lutz Spruce-Hardwood Forest and Woodland</p> |
| <p>Shrubland</p>         | <p>Alaskan Pacific Acidic Shrub Peatland<br/> Alaskan Pacific Wet Low Shrubland &amp; Floodplain Wetland<br/> North American Arctic Polygonal Ground Shrub-Tussock Tundra<br/> North American Arctic-Subarctic Shrub-Tussock Tundra<br/> Western North American Boreal Shrub Floodplain<br/> Western North American Boreal Shrub Swamp<br/> Alaskan Pacific Acidic Sedge Peatland<br/> Western North American Boreal Herbaceous Floodplain<br/> Alaska Arctic Floodplain Forest<br/> Alaska Arctic Large River Floodplain Forest<br/> Alaska Arctic Mesic Alder Shrubland<br/> Alaska Sub-boreal Mesic Subalpine Alder Shrubland<br/> Alaskan Pacific Maritime Avalanche Slope Shrubland<br/> Alaskan Pacific-Aleutian Alder-Salmonberry-Copperbush Shrubland<br/> Aleutian Mesic-Wet Willow Shrubland<br/> North American Arctic Mesic-Wet Low Willow Shrubland<br/> North American Arctic Scrub Birch-Ericaceous Shrubland</p>                                                                                                                                                                                                                                                                                                                  |

|                           |                                                                                                                                                                                                                                                                                                                                                                                                                                                                                                          |
|---------------------------|----------------------------------------------------------------------------------------------------------------------------------------------------------------------------------------------------------------------------------------------------------------------------------------------------------------------------------------------------------------------------------------------------------------------------------------------------------------------------------------------------------|
|                           | <p>Western North American Boreal Mesic Scrub Birch-Willow Shrubland<br/> Alaska Arctic Floodplain Shrubland<br/> Alaska Arctic Large River Floodplain Shrubland<br/> North Pacific Shrub Swamp<br/> Alaskan Pacific Alpine-Subalpine Dwarf-shrubland &amp; Heath<br/> Aleutian Ericaceous Dwarf-shrubland Heath and Fell-field<br/> North American Arctic Dryas Tundra<br/> North American Arctic Mesic Sedge-Willow Tundra</p>                                                                          |
| <p>Sparsely Vegetated</p> | <p>Western North American Boreal Dry Aspen-Steppe Bluff<br/> Western North American Boreal Lowland Large River Floodplain Sparse Vegetation<br/> Western North American Boreal Montane Floodplain Sparse Vegetation<br/> Alaskan Pacific Floodplain Sparse Vegetation<br/> Alaska Arctic Large River Floodplain Sparse Vegetation<br/> Alaskan Pacific Maritime Alpine Floodplain Shrubland<br/> Alaska Arctic Permafrost Plateau Dwarf-Shrub Lichen Tundra<br/> North American Arctic Lichen Tundra</p> |

|         |                                                                                                                                                                                                                                                                                                                                                                                                                                                                                                                                                                                                                                                                                                                                                                                                                                                                                                                                                           |
|---------|-----------------------------------------------------------------------------------------------------------------------------------------------------------------------------------------------------------------------------------------------------------------------------------------------------------------------------------------------------------------------------------------------------------------------------------------------------------------------------------------------------------------------------------------------------------------------------------------------------------------------------------------------------------------------------------------------------------------------------------------------------------------------------------------------------------------------------------------------------------------------------------------------------------------------------------------------------------|
|         |                                                                                                                                                                                                                                                                                                                                                                                                                                                                                                                                                                                                                                                                                                                                                                                                                                                                                                                                                           |
| Wetland | <p>Western North American Boreal Shrub-Sedge Bog &amp; Acidic Fen<br/> Western North American Boreal Black Spruce-Tamarack Fen<br/> Alaskan Pacific-Aleutian Fen and Wet Meadow<br/> Western North American Boreal Shrub-Sedge Rich and Alkaline Fen<br/> Western North American Boreal Herbaceous Rich and Alkaline Fen<br/> Alaskan Pacific Wet Low Shrubland &amp; Floodplain Wetland<br/> North American Arctic Freshwater Marsh<br/> North American Arctic-Subarctic Tidal Salt and Brackish Marsh<br/> Western North American Boreal Freshwater Emergent Marsh<br/> Temperate Pacific Freshwater Emergent Marsh<br/> Temperate Pacific Tidal Salt and Brackish Marsh<br/> Western North American Boreal Shrub Swamp<br/> North Pacific Shrub Swamp<br/> Alaska Arctic Tidal Flat<br/> Temperate Pacific Intertidal Flat<br/> North American Arctic Wet Sedge Tundra and Polygonal Ground<br/> North American Arctic Wet Sedge-Sphagnum Peatland</p> |

**Table S4:** Full List of the LANDFIRE Existing Vegetation Types product with the classifications grouped by class type.

**Table S5:VLCE**

| <b>Class</b> | <b>Class Description</b> |
|--------------|--------------------------|
| 0            | no change                |
| 20           | water                    |
| 31           | snow and ice             |
| 32           | rock and rubble          |
| 33           | barren                   |
| 40           | bryoids                  |
| 50           | shrubs                   |
| 80           | wetland                  |
| 81           | wetland-treed            |
| 100          | herbaceous               |
| 210          | coniferous               |
| 220          | broadleaf                |
| 230          | mixedwood                |

**Table S6:** Canada Tree Species Map

| <b>Value</b> | <b>Species Name</b> | <b>Common Name</b> |
|--------------|---------------------|--------------------|
| 0            | Non treed           | Non treed          |
| 1            | ABIE.AMA            | Amabilis fir       |
| 2            | ABIE.BAL            | Balsam fir         |
| 3            | ABIE.LAS            | Subalpine fir      |
| 4            | ACER.MAC            | Bigleaf maple      |
| 5            | ACER.RUB            | Red maple          |
| 6            | ACER.SAH            | Sugar maple        |
| 7            | ALNU.INC            | Gray alder         |
| 8            | ALNU.RUB            | Red alder          |
| 9            | BETU.ALL            | Yellow birch       |
| 10           | BETU.PAP            | White birch        |
| 11           | CHAM.NOO            | Yellow-cedar       |
| 12           | FRAX.NIG            | Black ash          |
| 13           | LARI.LAR            | Tamarack           |
| 14           | LARI.OCC            | Western larch      |
| 15           | PICE.ABI            | Norway spruce      |
| 16           | PICE.ENG            | Engelmann spruce   |
| 17           | PICE.GLA            | White spruce       |
| 18           | PICE.MAR            | Black spruce       |
| 19           | PICE.RUB            | Red spruce         |

**Table S7:** CORINE Land Cover

| Value | CLASS                                                                                  |
|-------|----------------------------------------------------------------------------------------|
| 1     | Continuous urban fabric                                                                |
| 2     | Discontinuous urban fabric                                                             |
| 3     | Industrial or commercial units                                                         |
| 4     | Road and rail networks and associated land                                             |
| 5     | Port areas                                                                             |
| 6     | Airports                                                                               |
| 7     | Mineral extraction sites                                                               |
| 8     | Dump sites                                                                             |
| 9     | Construction sites                                                                     |
| 10    | Green urban areas                                                                      |
| 11    | Sport and leisure facilities                                                           |
| 12    | Non-irrigated arable land                                                              |
| 13    | Permanently irrigated land                                                             |
| 14    | Rice fields                                                                            |
| 15    | Vineyards                                                                              |
| 16    | Fruit trees and berry plantations                                                      |
| 17    | Olive groves                                                                           |
| 18    | Pastures                                                                               |
| 19    | Annual crops associated with permanent crops                                           |
| 20    | Complex cultivation patterns                                                           |
| 21    | Land principally occupied by agriculture, with significant areas of natural vegetation |
| 22    | Agro-forestry areas                                                                    |
| 23    | Broad-leaved forest                                                                    |
| 24    | Coniferous forest                                                                      |
| 25    | Mixed forest                                                                           |
| 26    | Natural grasslands                                                                     |
| 27    | Moors and heathland                                                                    |
| 28    | Sclerophyllous vegetation                                                              |
| 29    | Transitional woodland-shrub                                                            |
| 30    | Beaches, dunes, sands                                                                  |
| 31    | Bare rocks                                                                             |
| 32    | Sparsely vegetated areas                                                               |
| 33    | Burnt areas                                                                            |
| 34    | Glaciers and perpetual snow                                                            |
| 35    | Inland marshes                                                                         |
| 36    | Peat bogs                                                                              |
| 37    | Salt marshes                                                                           |
| 38    | Salines                                                                                |
| 39    | Intertidal flats                                                                       |
| 40    | Water courses                                                                          |
| 41    | Water bodies                                                                           |
| 42    | Coastal lagoons                                                                        |
| 43    | Estuaries                                                                              |
| 44    | Sea and ocean                                                                          |
| 48    | NODATA                                                                                 |

**Table S8:** List of European Dominant Tree Species Product

|    | <b>Class</b>                    |
|----|---------------------------------|
| 1  | Abies spp                       |
| 2  | Alnus spp                       |
| 3  | Betula spp                      |
| 4  | Carpinus spp                    |
| 5  | Castanea spp                    |
| 6  | Eucalyptus spp                  |
| 7  | Fagus spp                       |
| 8  | Fraxinus spp                    |
| 9  | Larix spp                       |
| 10 | Broadleaved misc                |
| 11 | Conifers misc                   |
| 12 | Pinus misc                      |
| 13 | Quercus misc                    |
| 14 | Picea spp                       |
| 15 | Pinus pinaster                  |
| 16 | Pinus sylvestris                |
| 17 | Populus spp                     |
| 18 | Pseudotsuga menziesii           |
| 19 | Quercus robur & Quercus petraea |
| 20 | Robinia spp                     |

**Table S9:**

|    | <b>Bartalev et al. 2003</b>      | <b>Bartalev Tree Species</b>                                        |
|----|----------------------------------|---------------------------------------------------------------------|
| 0  | Unclassified                     |                                                                     |
| 1  | Evergreen Needle-leaf Forest     | Cedar<br>Elfin Wood<br>Pine<br>Siberian Pine<br>Fir<br>Spruce       |
| 3  | Deciduous Broadleaf Forest       | Maple<br>Linden<br>Aspen<br>Birch<br>Betula ermanii<br>Beech<br>Oak |
| 4  | Needle-leaf/Broadleaf Forest     | Larch, sparse<br>Larch                                              |
| 5  | Mixed Forest                     |                                                                     |
| 6  | Broadleaf/Needle-leaf Forest     |                                                                     |
| 7  | Deciduous Needle-leaf Forest     | Larch, sparse<br>Larch                                              |
| 8  | Broadleaf deciduous shrubs       |                                                                     |
| 9  | Needle-leaf evergreen shrubs     |                                                                     |
| 10 | Humid grasslands                 |                                                                     |
| 11 | Steppe                           |                                                                     |
| 12 | Bogs and marches                 |                                                                     |
| 13 | Palsa bogs                       |                                                                     |
| 14 | Riparian vegetation              |                                                                     |
| 15 | Barren tundra                    |                                                                     |
| 16 | Prostrate shrub tundra           |                                                                     |
| 17 | Sedge tundra                     |                                                                     |
| 18 | Shrub tundra                     |                                                                     |
| 19 | Recent burns                     |                                                                     |
| 20 | Croplands                        |                                                                     |
| 21 | Forest - Natural Vegetation comp |                                                                     |
| 22 | Forest - Cropland complexes      |                                                                     |
| 23 | Cropland - Grassland complexes   |                                                                     |
| 24 | Bare soil and rock               |                                                                     |
| 25 | Permanent snow/ice               |                                                                     |
| 26 | Water bodies                     |                                                                     |
| 27 | Urban                            |                                                                     |
| 28 | Salt-march                       |                                                                     |
| 29 | Burns of year 2000               |                                                                     |

**Table S10:** Description of final hybrid land cover classes used in this study. Includes class definitions, typical vegetation, and source datasets from regional land cover products (Alaska, Canada, Russia, Fennoscandia) used to develop the 1 km hybrid land cover map.

| <b>Final Hybrid Class</b>                                      | <b>Description / Definition</b>                                                                                                                                   | <b>Typical Vegetation / Notes</b>                                | <b>Main Sources Used</b>                                                  |
|----------------------------------------------------------------|-------------------------------------------------------------------------------------------------------------------------------------------------------------------|------------------------------------------------------------------|---------------------------------------------------------------------------|
| Forest – Needleleaf Evergreen (Spruce, Pine, Fir, etc.)        | Areas with $\geq 15\%$ tree crown cover dominated by evergreen conifers (Picea, Pinus, Abies). Includes both closed ( $>40\%$ ) and open (15–40%) canopy forests. | Boreal conifer forests; black and white spruce, Scots pine, fir. | ESA CCI classes 70–72; LANDFIRE coniferous EVT; Bartalev conifer classes. |
| Forest – Broadleaf Deciduous (Birch, Aspen, Poplar, Oak, etc.) | Areas with $\geq 15\%$ crown cover dominated by deciduous broadleaved trees.                                                                                      | Aspen–birch woodlands, poplar floodplain forests, oak forests.   | ESA 60–62; CAN VLCE broadleaf; CORINE class 23.                           |
| Forest – Mixed                                                 | Mixed needleleaf and broadleaf stands, both evergreen and deciduous components.                                                                                   | Boreal mixed spruce–birch forests, larch–birch mosaics.          | ESA 90; LANDFIRE EVT mixed types; Bartalev mixedwood.                     |
| Larch Forest (Needleleaf Deciduous)                            | Deciduous conifer forest dominated by Larix spp., with $\geq 15\%$ canopy cover.                                                                                  | Common in eastern Siberia and parts of interior Alaska.          | ESA 80–82; Bartalev larch classes.                                        |
| Shrubland – Erect / Low Shrub Tundra                           | Dominated by erect or low deciduous shrubs (Betula, Salix, Alnus) typically 20–200 cm tall; may include moss and lichen understory.                               | Mesic tundra; common across low Arctic tundra.                   | CAVM S1–S2; LANDFIRE shrub EVT; CORINE 27.                                |
| Shrubland – Prostrate / Dwarf Shrub Tundra                     | Vegetation $< 20$ cm tall dominated by dwarf-shrubs (Dryas, Cassiope, Empetrum).                                                                                  | Common on dry ridges, heaths, or exposed tundra.                 | CAVM P1–P2; ESA 122; CORINE 29.                                           |
| Graminoid Tundra                                               | Herbaceous tundra dominated by sedges and grasses, often with mosses.                                                                                             | Moist non-tussock tundra, polygonal ground areas.                | CAVM G1–G4; ESA 130; LANDFIRE tundra classes.                             |

|                                      |                                                                                                                                      |                                                                       |                                           |
|--------------------------------------|--------------------------------------------------------------------------------------------------------------------------------------|-----------------------------------------------------------------------|-------------------------------------------|
| Wet-sedge Tundra /<br>Wetland Tundra | Herbaceous or sedge-moss wetlands with high soil moisture or shallow standing water.                                                 | Sedge meadows, polygonal troughs, and marshy tundra.                  | CAVM W1–W3; LANDFIRE wet tundra; ESA 180. |
| Bog                                  | Peat-accumulating wetlands with acidic, nutrient-poor conditions; dominated by Sphagnum, ericaceous shrubs, or stunted black spruce. | Boreal peatlands.                                                     | LANDFIRE bog/fen; ESA 160/180; GWF.       |
| Fen                                  | Peat-forming wetlands with minerotrophic influence (groundwater-fed); dominated by sedges, mosses, and scattered shrubs.             | Boreal rich fens and patterned peatlands.                             | LANDFIRE fen; ESA 180; GWF.               |
| Marsh                                | Non-peat-forming wetlands periodically or permanently inundated; dominated by emergent sedges and grasses.                           | Floodplain and coastal marshes.                                       | ESA 170; GWF marsh classes.               |
| Herbaceous / Grassland               | Non-woody vegetation with <15% shrub or tree cover.                                                                                  | Upland tundra meadows, subarctic grasslands, alpine herbaceous cover. | ESA 130; LANDFIRE herbaceous EVT.         |
| Sparsely Vegetated /<br>Barren       | Areas with <15% vegetation cover; includes rocky, lichen, and moss-dominated tundra.                                                 | Dry heaths, gravelly slopes, bedrock outcrops.                        | ESA 140–153; CAVM B1–B3.                  |
| Water / Snow / Ice /<br>Urban        | Non-vegetated surfaces classified separately (where available).                                                                      | Lakes, glaciers, rivers, built-up.                                    | ESA water/urban; regional datasets.       |

# LANDFIRE EVT

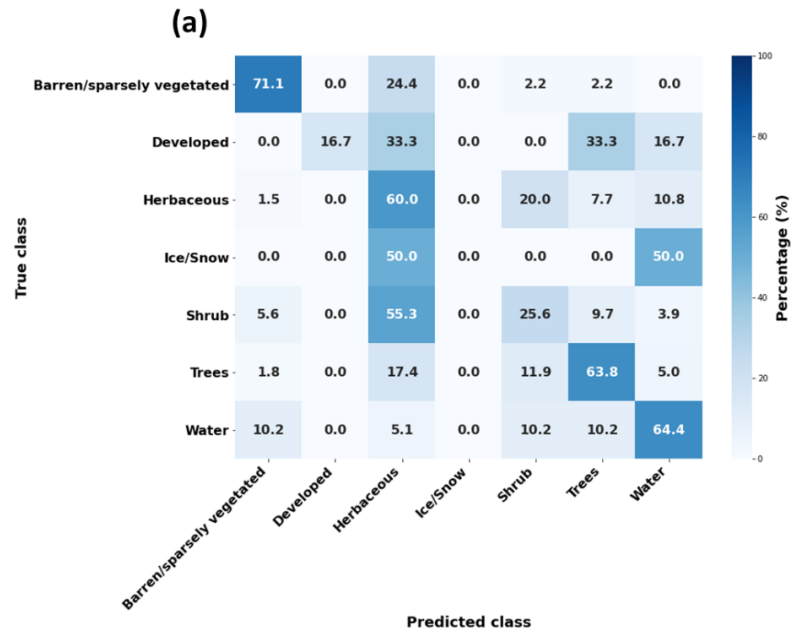

Overall Accuracy (OA): 45.17% | Cohen's Kappa: 0.310

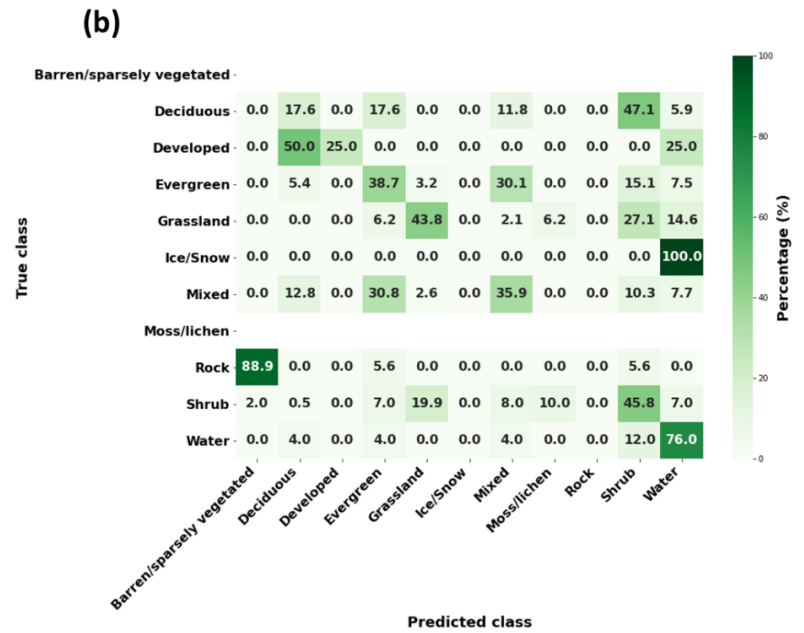

Overall Accuracy (OA): 43.52% | Cohen's Kappa: 0.296

# CAN VLCE

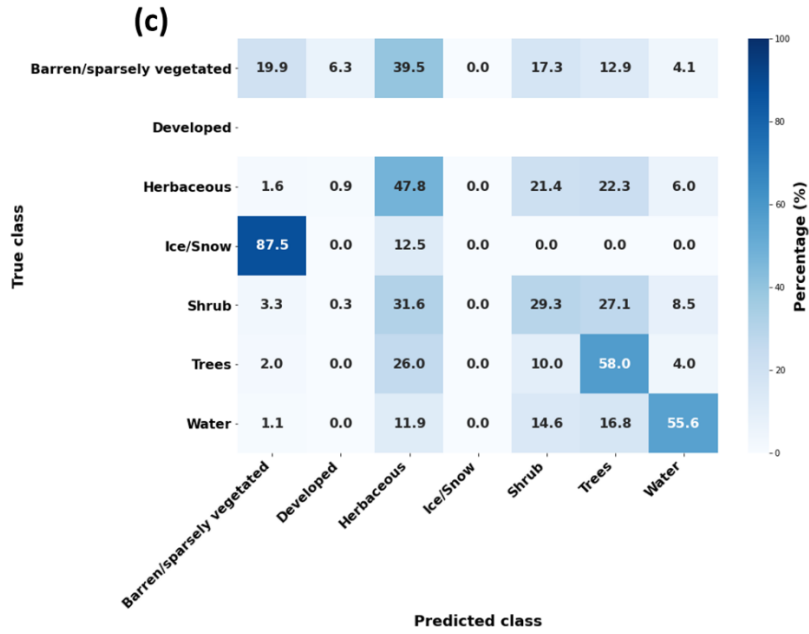

Overall Accuracy (OA): 38.13% | Cohen's Kappa: 0.229

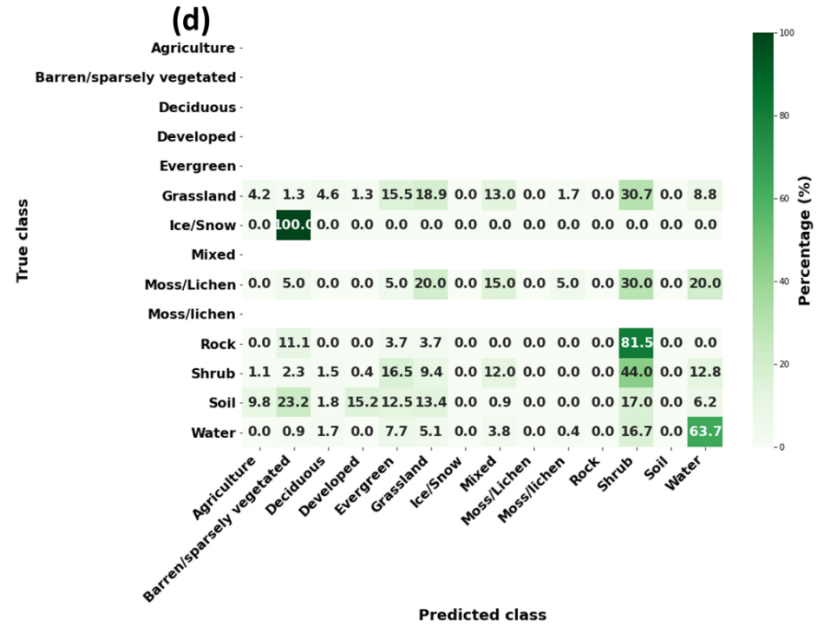

Overall Accuracy (OA): 34.40% | Cohen's Kappa: 0.199

# CORINE

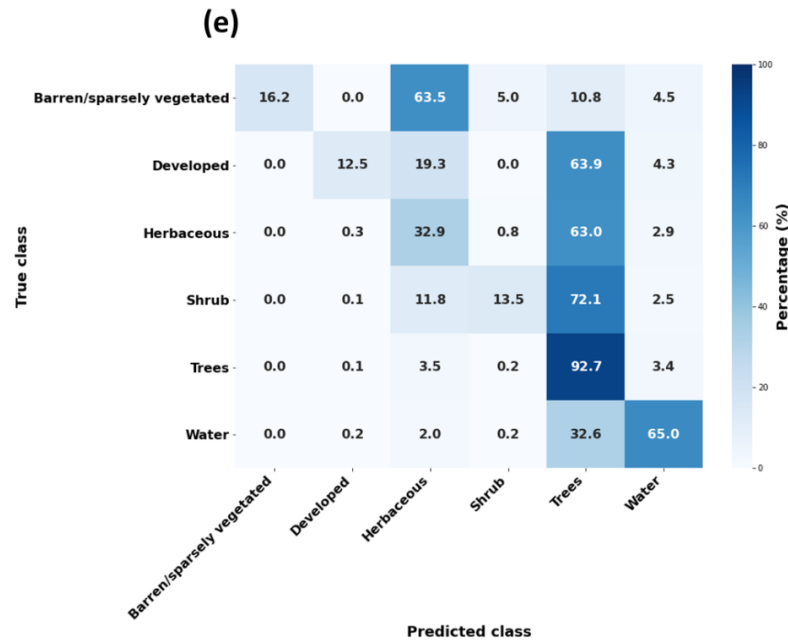

Overall Accuracy (OA): 72.18% | Cohen's Kappa: 0.400

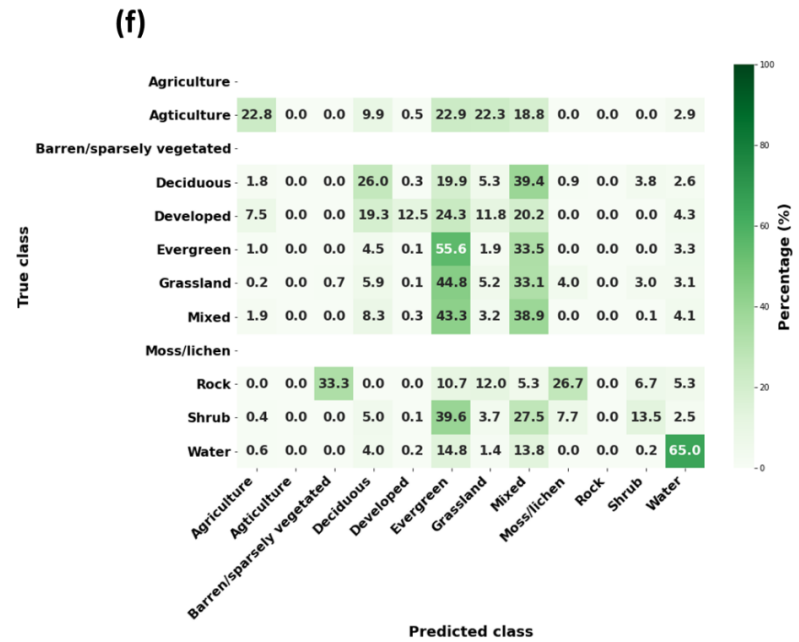

Overall Accuracy (OA): 40.76% | Cohen's Kappa: 0.195

## Bartalev

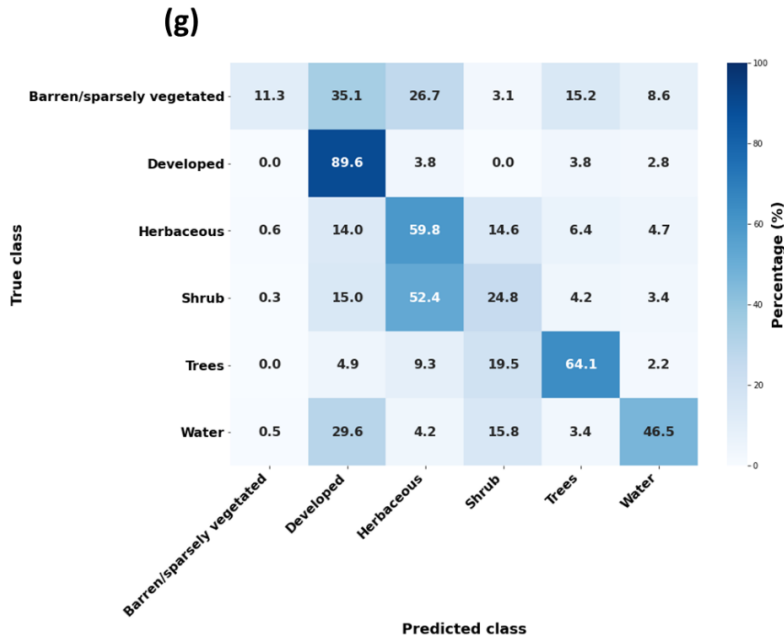

Overall Accuracy (OA): 60.08% | Cohen's Kappa: 0.387

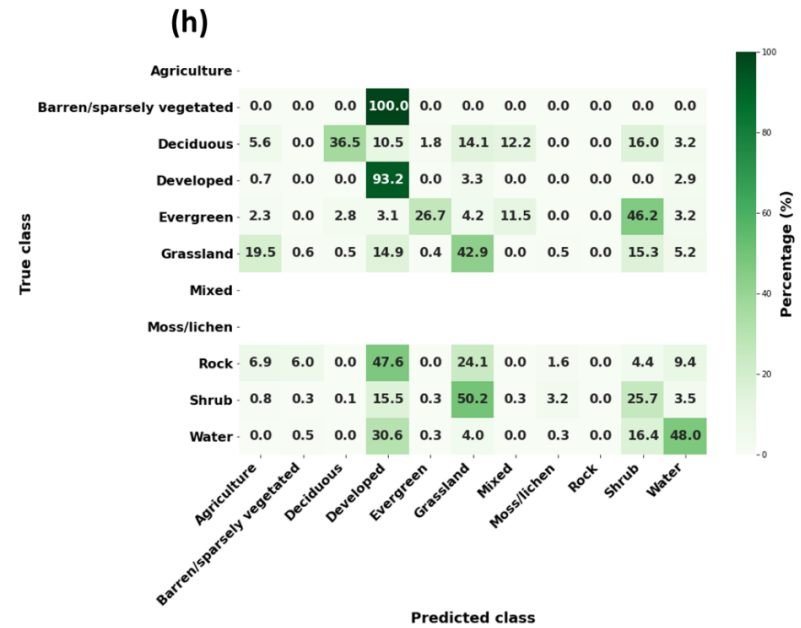

Overall Accuracy (OA): 36.65% | Cohen's Kappa: 0.266

**Figure S6:** Confusion matrices for the main regional land cover products used within the study including the Alaskan LANDFIRE EVT, Canadian VLCE, CORINE, and Bartalev et al. for level 1 classes (a, c, e, g) and level 2 land cover classes (b, d, f, h). Regional land cover products are referenced as True Class, while the GLance dataset is labeled as the Predicted class. Rows with only zeros present appear white.
